# Supplementary material for: Total Triterpenes, Polyphenols, Flavonoids, and Antioxidant Activity of Bioactive Phytochemicals of Centella asiatica by Different Extraction Techniques
Source: MDPI journal article supplement (doi:10.3390/foods12213972), 2023-10-30
Supplement: s1 [file s1]

**Supplementary table ST1** CIE L\*a\*b\* colour space measurements taken before and after air drying of *C. asiatica* leaf samples

| Value   | Before drying |               |              | After drying |              |              |
|---------|---------------|---------------|--------------|--------------|--------------|--------------|
|         | L*            | a*            | b*           | L*           | a*           | b*           |
| 1       | 39.69         | +0.62         | -1.05        | 40.60        | +0.09        | -0.01        |
| 2       | 38.30         | +1.51         | -2.29        | 39.11        | +1.30        | -1.72        |
| 3       | 41.82         | +0.79         | +0.64        | 40.12        | +1.03        | -1.31        |
| Average | <b>39.93</b>  | <b>+0.973</b> | <b>-0.90</b> | <b>39.94</b> | <b>+0.81</b> | <b>-1.01</b> |

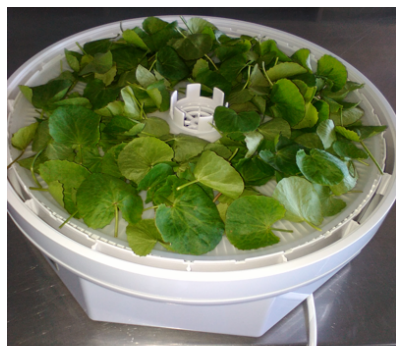

Fresh leaves

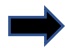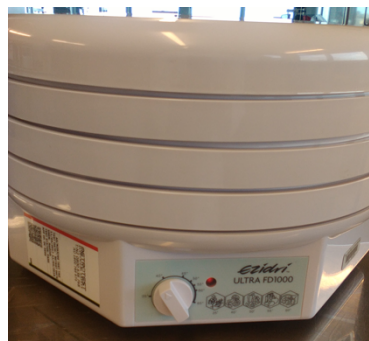

Air drying

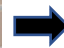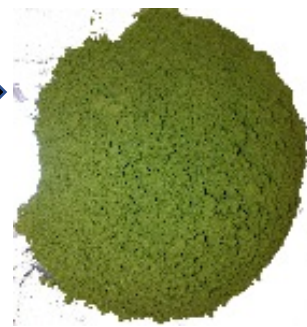

Dried powder
