# Supplementary figures and images for: Total Triterpenes, Polyphenols, Flavonoids, and Antioxidant Activity of Bioactive Phytochemicals of Centella asiatica by Different Extraction Techniques
Source: MDPI journal article supplement (doi:10.3390/foods12213972), 2023-10-30

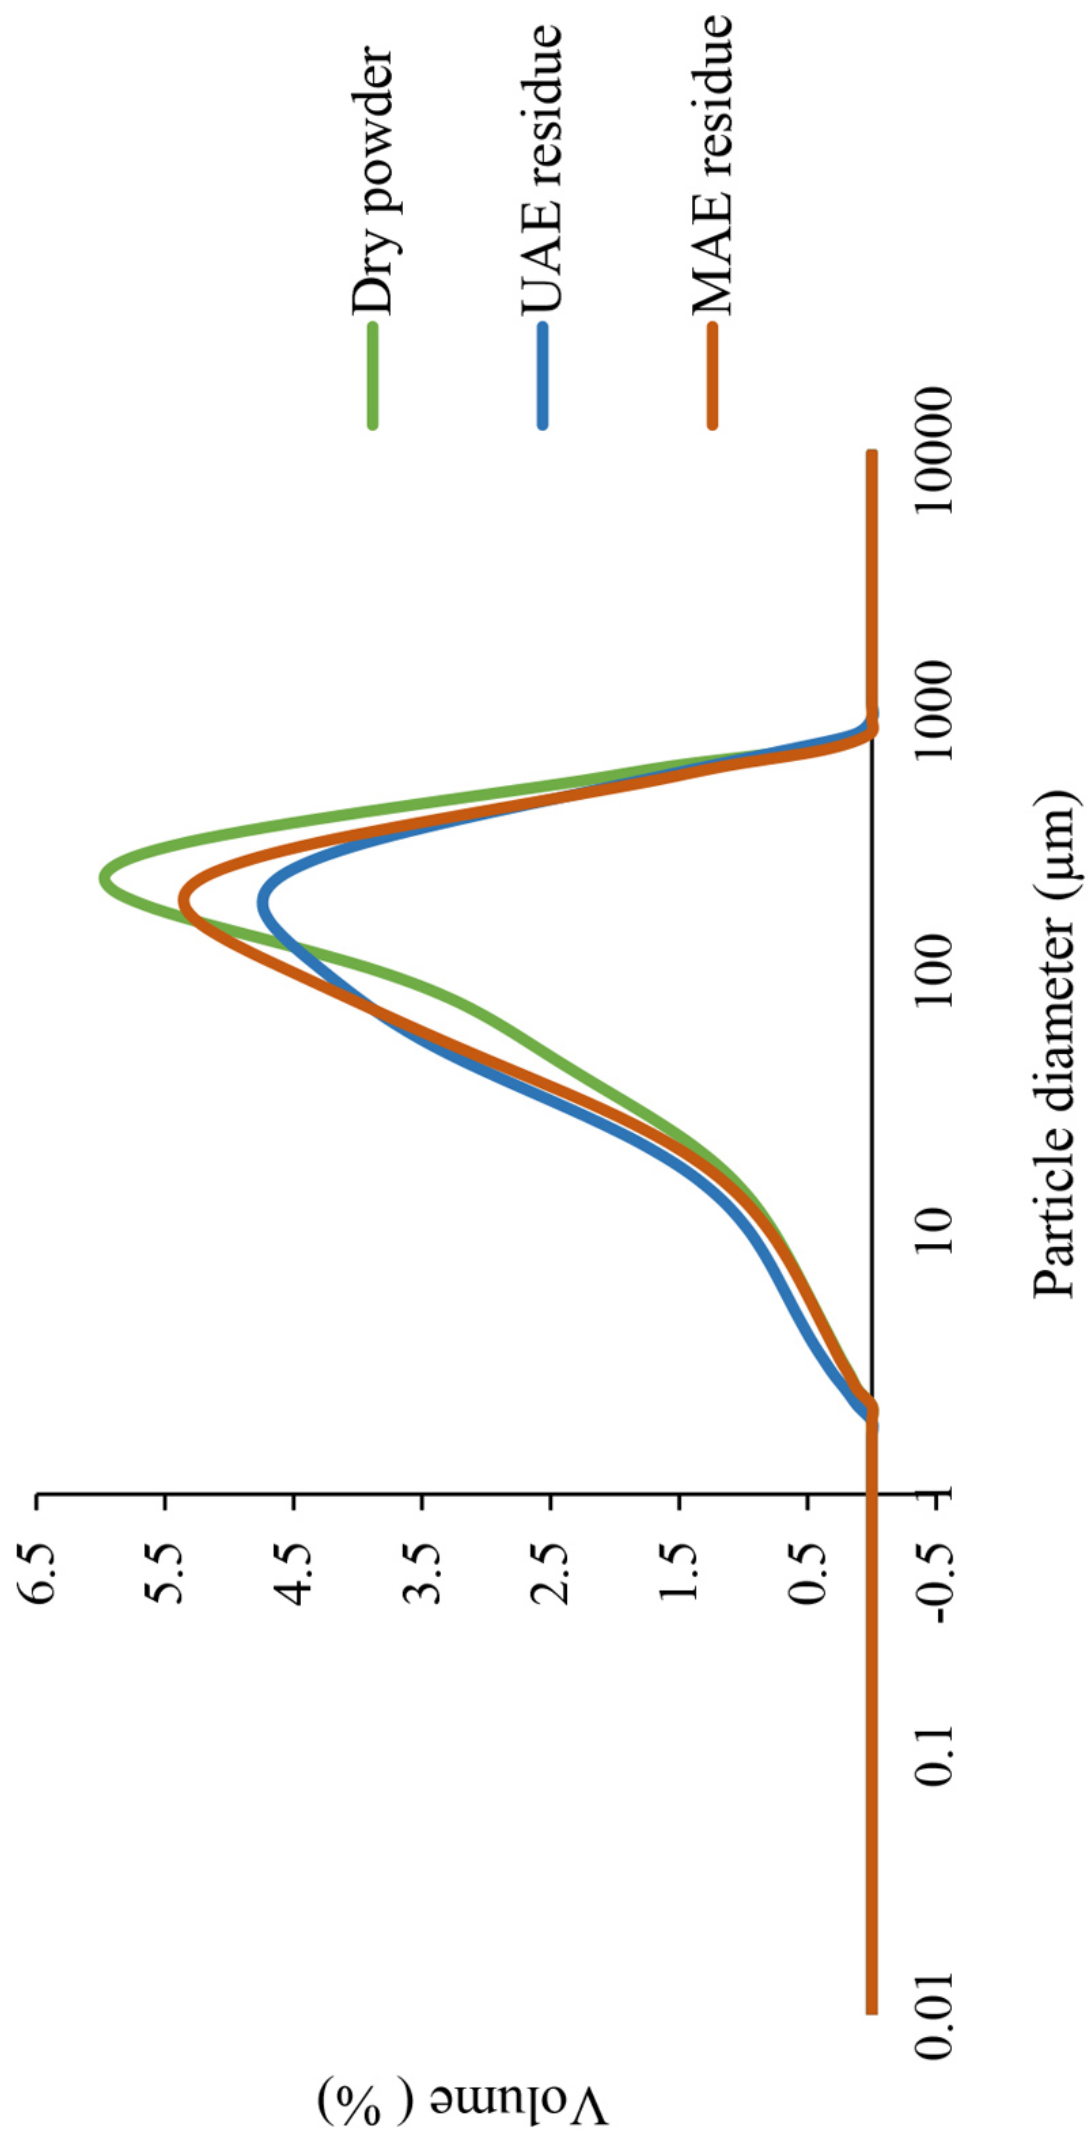

Supplement: s1 [file s1]

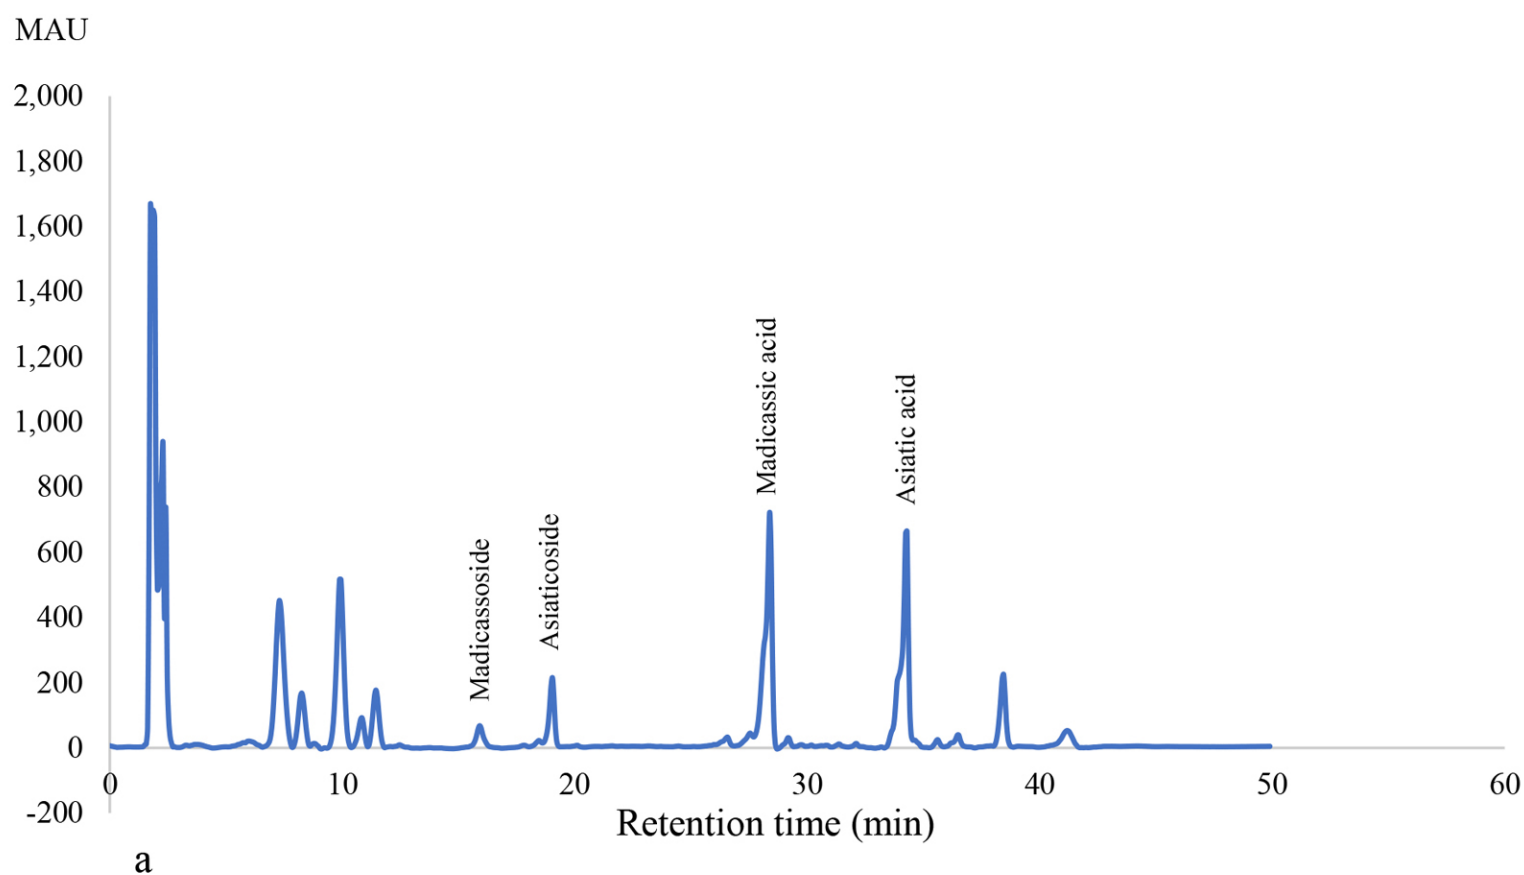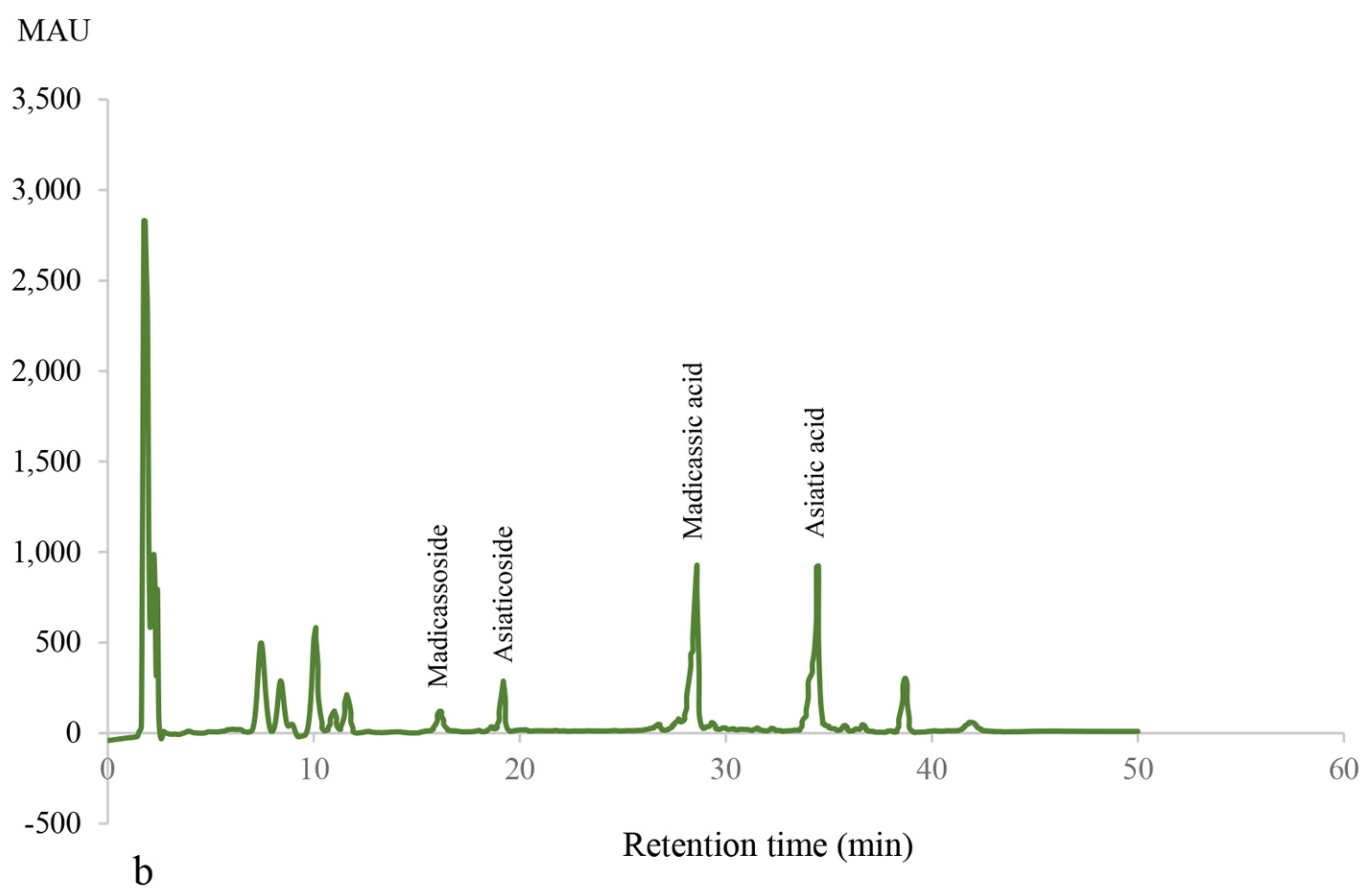

Supplement: s1 [file s1]
